# Supplementary material
Source: PubMed Central journal article supplement (PMC4997876)
Supplement: AAC.00307-16_zac009165444so1.pdf [file AAC.00307-16_zac009165444so1.pdf]

**Supplemental Figure 1A**

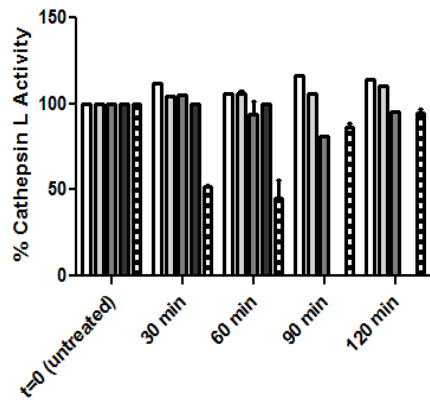

**Supplemental Figure 1B**

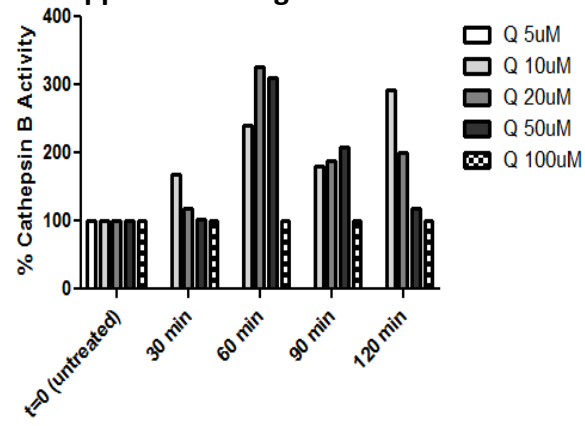

**Supplemental Figure 2**

untreated

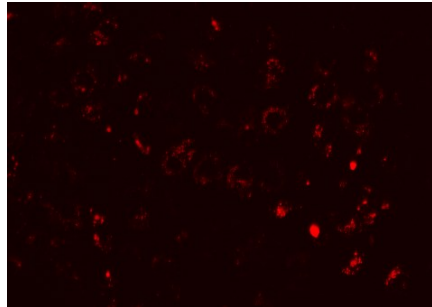

5  $\mu$ M Q3G

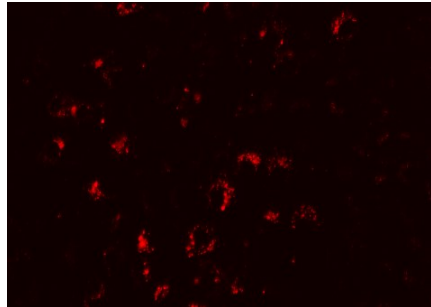

10  $\mu$ M Q3G

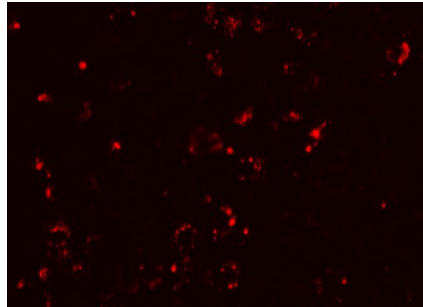

20  $\mu$ M Q3G

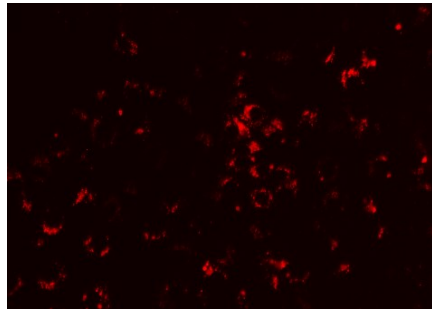

50  $\mu$ M Q3G

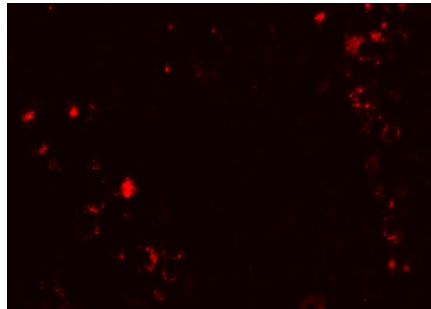

100  $\mu$ M Q3G

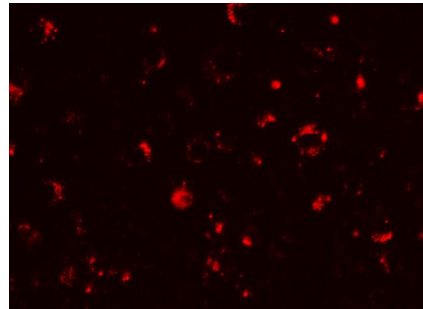

## Supplementary Figure Legends

Supplemental Figure 1: Effect of Q3G on cathepsin L or B activity: Vero E6 cells were incubated with Q3G, lysed for cytoplasmic proteins and incubated with a fluorescent cathepsin substrate. The amount of cleaved substrate via (A) Cathepsin L and (B) Cathepsin B was measured with a fluorescent plate reader. All experiments were done in triplicate.

Supplemental Figure 2: Effect of Q3G on lysosomal pH: Vero E6 cells were grown to 85% confluence, treated with a range of doses of Q3G (0-100  $\mu$ M) for 1 hour and stained with 100 nM LysoTracker for 30 minutes at 37°C. Live images were taken with an EVOS microscope at 10X magnification. All experiments were performed in duplicate.

## Supplementary Methods

### *Effect of Q3G on the activity of cathepsins B and L*

Vero E6 cells were grown to 95% confluence and treated with a range of doses of Q3G (0-100  $\mu$ M) for 1 hour and assessed for cathepsin B and L activity using the Cathepsin Activity Assay (Abcam) kits and following the manufacturer's instructions.

### *Effect of Q3G on acidification of lysosomes*

Vero E6 cells were grown to 85% confluence, treated with a range of doses of Q3G (0-100  $\mu$ M) for 1 hour and stained with 100 nM LysoTracker Red DND-99 (ThermoFisher Scientific) for 30 minutes at 37°C. Live images were taken with an EVOS microscope at 10X magnification.
